# Supplementary material for: A novel one-pot process for the preparation of linear and hyperbranched polycarbonates of various diols and triols using dimethyl carbonate
Source: Royal Society of Chemistry journal article supplement (doi:10.1039/c7ra01317e), 2017-01-01
Supplement: c7ra01317e1.pdf [file c7ra01317e1.pdf]

## Supporting Information

### **A novel one-pot process for preparation of linear and hyperbranched polycarbonates of various diols and triols using dimethyl carbonate**

*Jingjiang Sun<sup>1</sup>, Kamal Ibrahim Aly<sup>2</sup>, Dirk Kuckling\*<sup>1</sup>*

*<sup>1</sup>University of Paderborn, Chemistry Department, Warburger Str. 100, D-  
33098 Paderborn, Germany*

*Email: dirk.kuckling@uni-paderborn.de*

*<sup>2</sup> Assiut University, Faculty of Science, Chemistry Department, Polymer  
Research Laboratory, 71516 Assiut, Egypt*

*E-mail: kamalaly@aun.edu.eg*

●  $^1\text{H}$  and  $^{13}\text{C}$  NMR spectra of linear and hyperbranched polycarbonates

**Poly(trimethylene carbonate), (PTMC, Figure SI-1)**

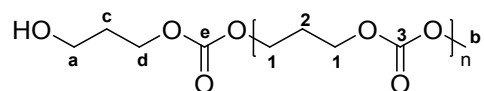

$^1\text{H}$ -NMR (500 MHz,  $\text{CDCl}_3$ )

$\delta$  (ppm) = 2.04 (m, 2 H,  $^2\text{CH}_2$ ), 3.73 (t, 2 H,  $^3J_{\text{HH}} = 5.8$  Hz,  $^a\text{CH}_2$ ), 3.77 (s, 3 H,  $\text{O}^b\text{CH}$ ), 4.23 (t, 4 H,  $^3J_{\text{HH}} = 6.2$  Hz,  $^1\text{CH}_2$ )

$^{13}\text{C}$ -NMR (125 MHz,  $\text{CDCl}_3$ )

$\delta$  (ppm) = 28.14 (1 C,  $^2\text{CH}_2$ ), 37.13 (1 C,  $^c\text{CH}_2$ ), 59.01 (1 C,  $^a\text{CH}_2$ ), 64.37 (2 C,  $^1\text{CH}_2$ ), 65.13 (1 C,  $^d\text{CH}_2$ ), 154.97 (1 C,  $^3\text{C}_q$ ), 155.35 (1 C,  $^e\text{C}_q$ )

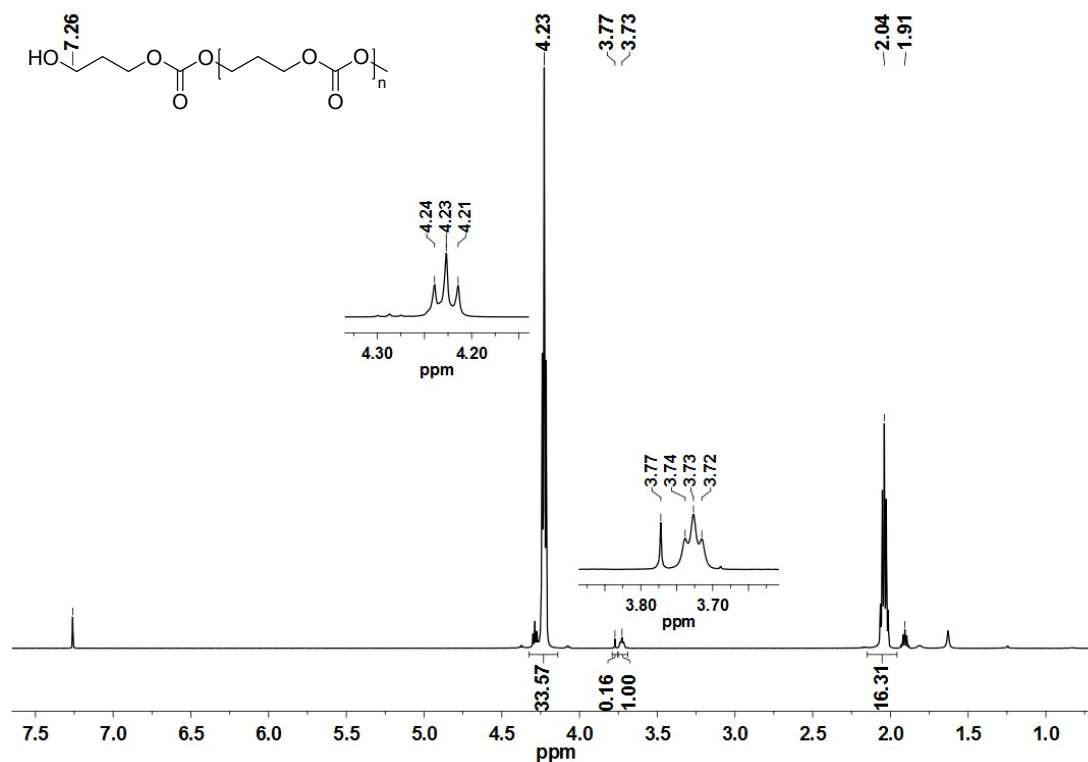

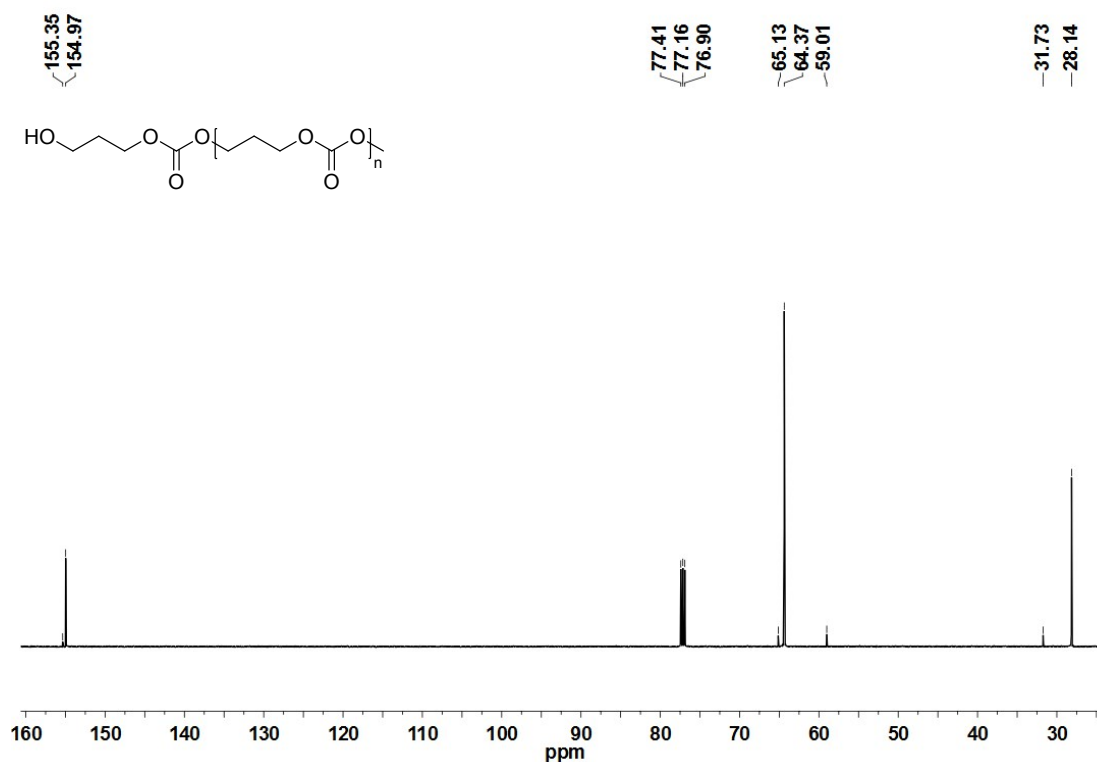

Figure SI-1.  $^1\text{H}$  and  $^{13}\text{C}$  NMR spectra of PTMC

**Poly(butylene carbonate), (PBC, Figure SI-2)**

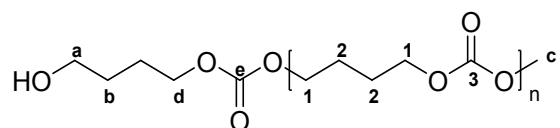

$^1\text{H}$ -NMR (500 MHz,  $\text{CDCl}_3$ )

$\delta$  (ppm) = 1.65 (m, 3 H,  $^b\text{CH}_2$ , OH), 1.76 (b, 4 H,  $^2\text{CH}_2$ ), 3.67 (t, 2 H,  $^3\text{J}_{\text{HH}} = 6.3$  Hz,  $^a\text{CH}_2$ ), 3.77 (s, 3 H,  $\text{O}^c\text{CH}_3$ ), 4.15 (b, 4 H,  $^1\text{CH}_2$ )

$^{13}\text{C}$ -NMR (125 MHz,  $\text{CDCl}_3$ )

$\delta$  (ppm) = 28.28 (2 C,  $^2\text{CH}_2$ ), 29.04 (1 C,  $^b\text{CH}_2$ ), 54.83 (1 C,  $^c\text{CH}_3$ ), 62.39 (1 C,  $^a\text{CH}_2$ ), 67.39 (2 C,  $^1\text{CH}_2$ ), 67.89 (1 C,  $^d\text{CH}_2$ ), 155.30 (1 C,  $^3\text{C}_q$ ), 155.36 (1 C,  $^e\text{C}_q$ )

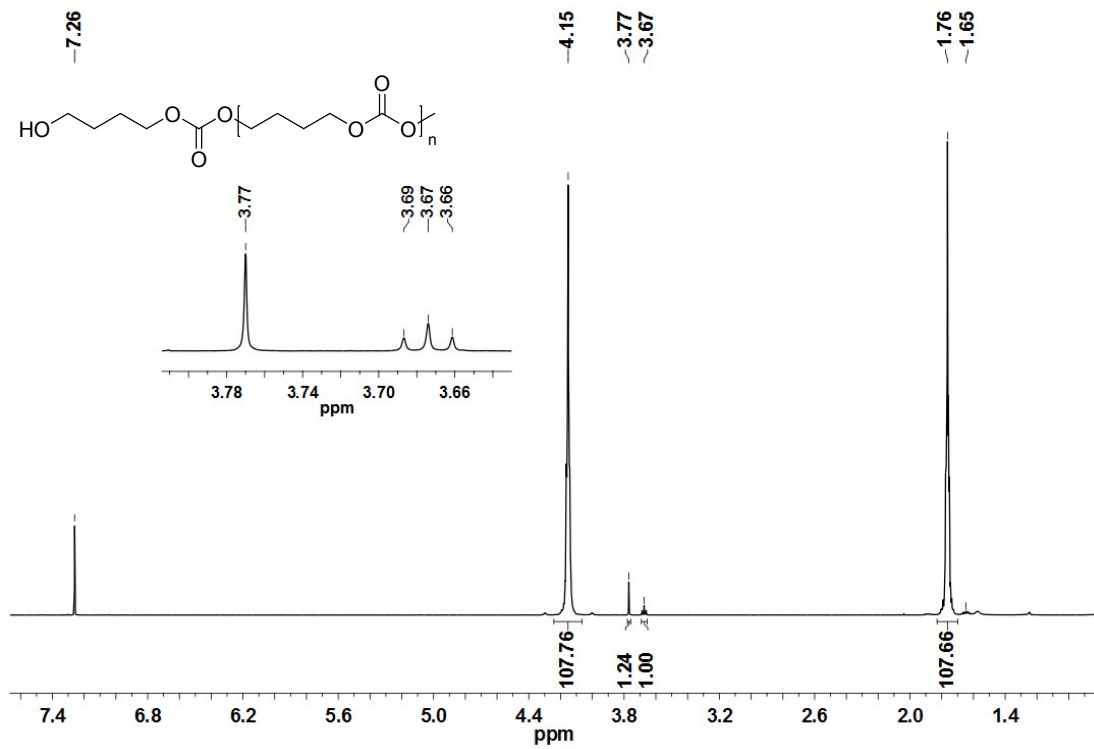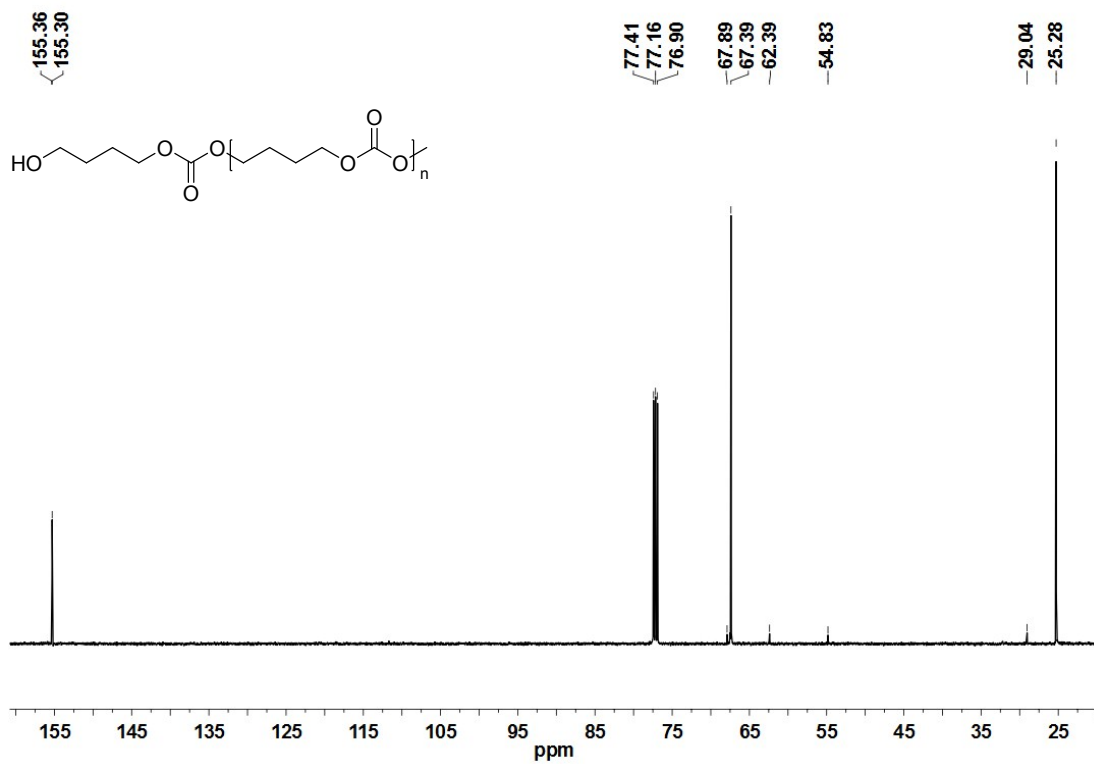

Figure SI-2. <sup>1</sup>H and <sup>13</sup>C NMR spectra of PBC

### Poly(pentamethylene carbonate), (PPC, Figure SI-3)

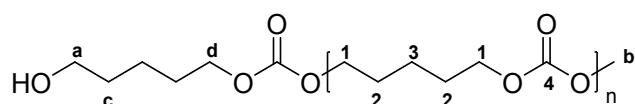

$^1\text{H-NMR}$  (500 MHz,  $\text{CDCl}_3$ )

$\delta$  (ppm) = 1.46 (m, 2 H,  $^3\text{CH}_2$ ), 1.70 (m, 4 H,  $^2\text{CH}_2$ ), 3.64 (t, 2 H,  $^3\text{J}_{\text{HH}} = 6.5$  Hz,  $^a\text{CH}_2$ ), 3.76 (s, 3 H,  $\text{O}^b\text{CH}_3$ ), 4.12 (t, 4 H,  $^3\text{J}_{\text{HH}} = 6.6$  Hz,  $^1\text{CH}_2$ )

$^{13}\text{C-NMR}$  (125 MHz,  $\text{CDCl}_3$ )

$\delta$  (ppm) = 21.97 (1 C,  $^3\text{CH}_2$ ), 28.19 (2 C,  $^2\text{CH}_2$ ), 32.14 (1 C,  $^c\text{CH}_2$ ), 62.51 (1 C,  $^a\text{CH}_2$ ), 67.50 (2 C,  $^1\text{CH}_2$ ), 67.71 (1 C,  $^d\text{CH}_2$ ), 155.16 (1 C,  $^4\text{C}_q$ )

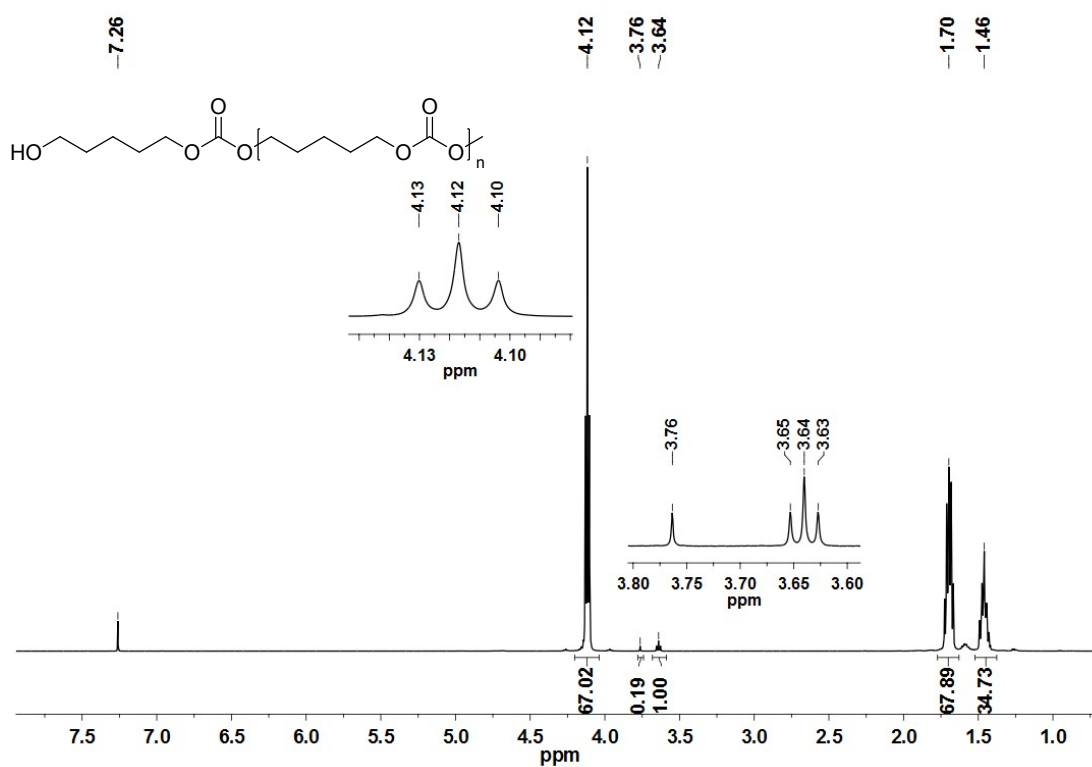

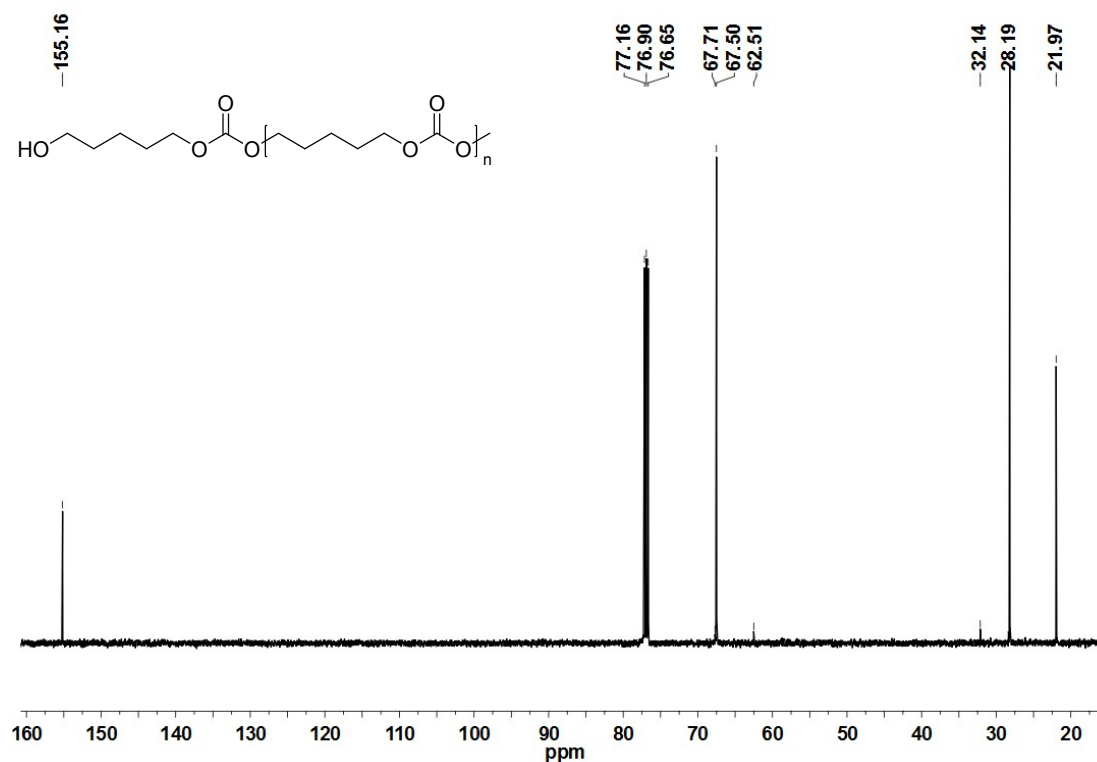

Figure SI-3. <sup>1</sup>H NMR and <sup>13</sup>C spectra of PPC

### **Poly(hexamethylene carbonate), (PHC, Figure SI-4)**

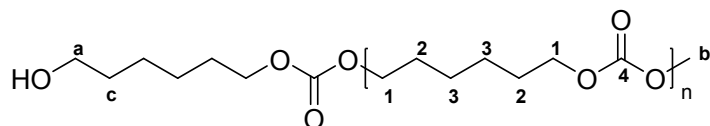

<sup>1</sup>H-NMR (500 MHz, CDCl<sub>3</sub>)

$\delta$  (ppm) = 1.40 (m, 4 H, <sup>3</sup>CH<sub>2</sub>), 1.67 (m, 4 H, <sup>2</sup>CH<sub>2</sub>), 3.63 (t, 2 H, <sup>3</sup>J<sub>HH</sub> = 6.5 Hz, <sup>a</sup>CH<sub>2</sub>), 3.77 (s, 3 H, O<sup>b</sup>CH<sub>3</sub>), 4.11 (t, 4 H, <sup>3</sup>J<sub>HH</sub> = 6.7 Hz, <sup>1</sup>CH<sub>2</sub>)

<sup>13</sup>C-NMR (125 MHz, CDCl<sub>3</sub>)

$\delta$  (ppm) = 25.75 (2 C, <sup>3</sup>CH<sub>2</sub>), 28.93 (2 C, <sup>2</sup>CH<sub>2</sub>), 32.95 (1 C, <sup>c</sup>CH<sub>2</sub>), 55.00 (1 C, <sup>b</sup>CH<sub>3</sub>), 63.13 (1 C, <sup>a</sup>CH<sub>2</sub>), 68.14 (2 C, <sup>1</sup>CH<sub>2</sub>), 155.72 (1 C, <sup>4</sup>C<sub>q</sub>)

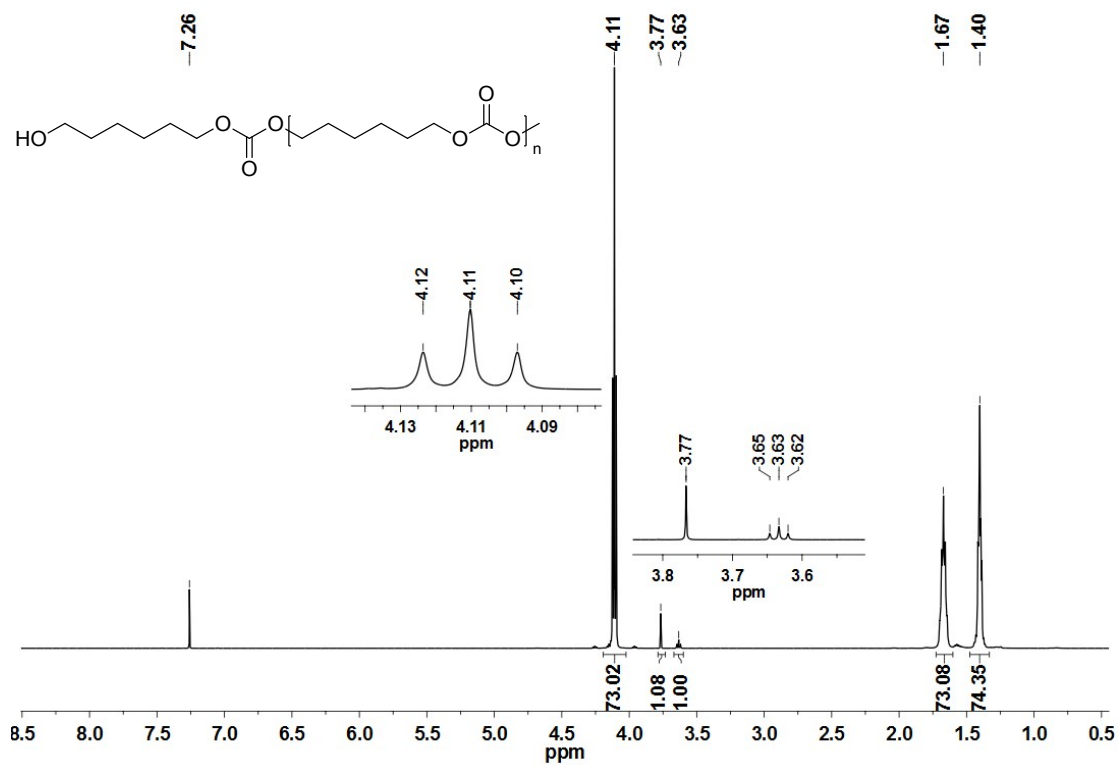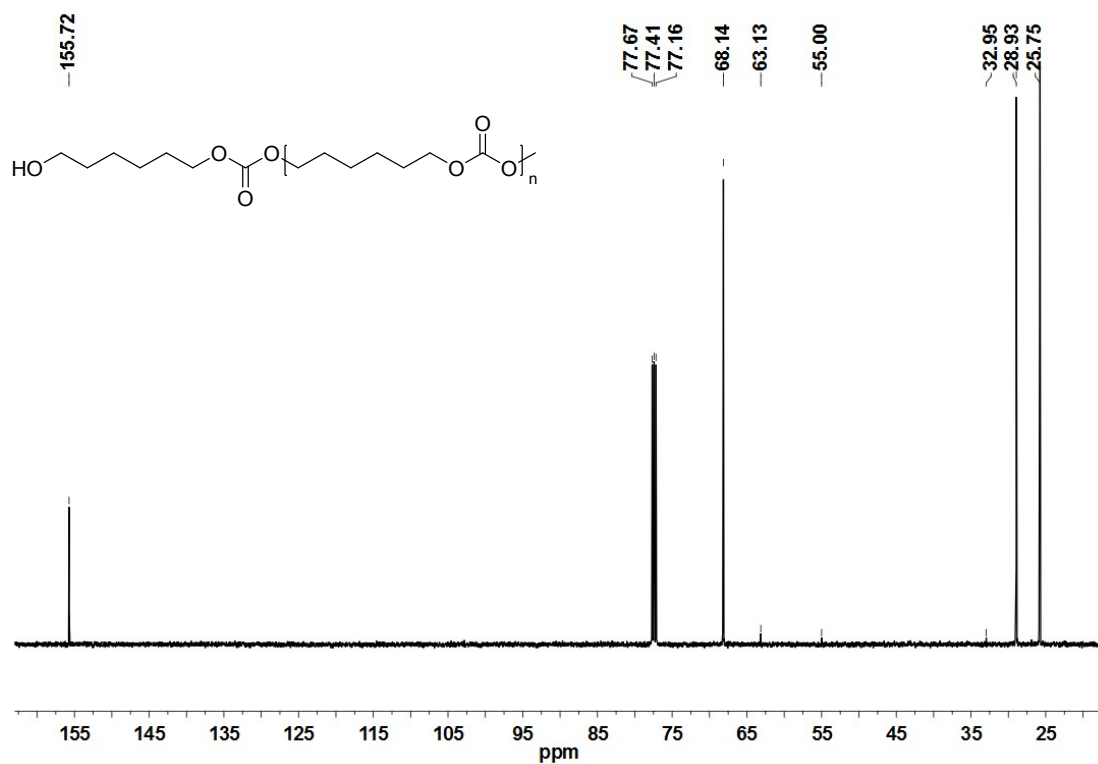

Figure SI-4. <sup>1</sup>H and <sup>13</sup>C NMR spectra of PHC

**Poly(diethylphenylamine carbonate), (PDEAC, Figure SI-5)**

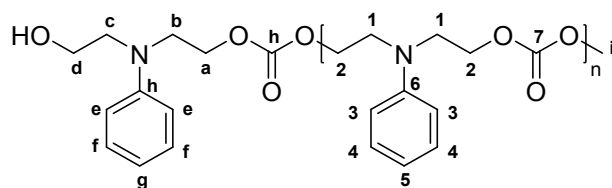

$^1\text{H-NMR}$  (500 MHz,  $\text{CDCl}_3$ )

$\delta$  (ppm) = 3.17 (t, 2 H,  $^3J_{\text{HH}} = 4.8$  Hz,  $^b\text{CH}_2$ ), 3.54-3.70 (m, 4 H,  $^1\text{CH}_2$ ), 3.50 (t, 2 H,  $^3J_{\text{HH}} = 5.6$  Hz,  $^c\text{CH}_2$ ), 3.77 (t, 2 H,  $^3J_{\text{HH}} = 5.6$  Hz,  $^d\text{CH}_2$ ), 3.87 (t, 2 H,  $^3J_{\text{HH}} = 4.8$  Hz,  $^a\text{CH}_2$ ), 4.17-4.40 (m, 4 H,  $^2\text{CH}_2$ ), 6.66-6.80 (m, 3 H,  $^{3,5}\text{CH}$ ), 6.86-6.94 (m, 3 H,  $^{e,g}\text{CH}$ ), 7.16-7.26 (m, 2 H,  $^4\text{CH}$ ), 7.26-7.31 (m, 2 H,  $^f\text{CH}$ )

$^{13}\text{C-NMR}$  (125 MHz,  $\text{CDCl}_3$ )

$\delta$  (ppm) = 49.52 (1 C,  $^b\text{CH}_2$ ), 49.79 (2 C,  $^1\text{CH}_2$ ), 50.64 (1 C,  $^c\text{CH}_2$ ), 54.50 (1 C,  $^i\text{CH}_3$ ), 60.30 (1 C,  $^d\text{CH}_2$ ), 64.91 (2 C,  $^2\text{CH}_2$ ), 67.07 (1 C,  $^a\text{CH}_2$ ), 112.29, 117.44, 129.65, 147.06 (6 C,  $^{3-6}\text{C}_{\text{Ar}}$ ), 113.08, 115.85, 120.17, 129.31, 129.53, 147.92 (6 C,  $^{e,f,g,h}\text{C}_{\text{Ar}}$ ), 155.15 (1 C,  $^7\text{C}_{\text{q}}$ ), 155.21 (1 C,  $^h\text{C}_{\text{q}}$ )

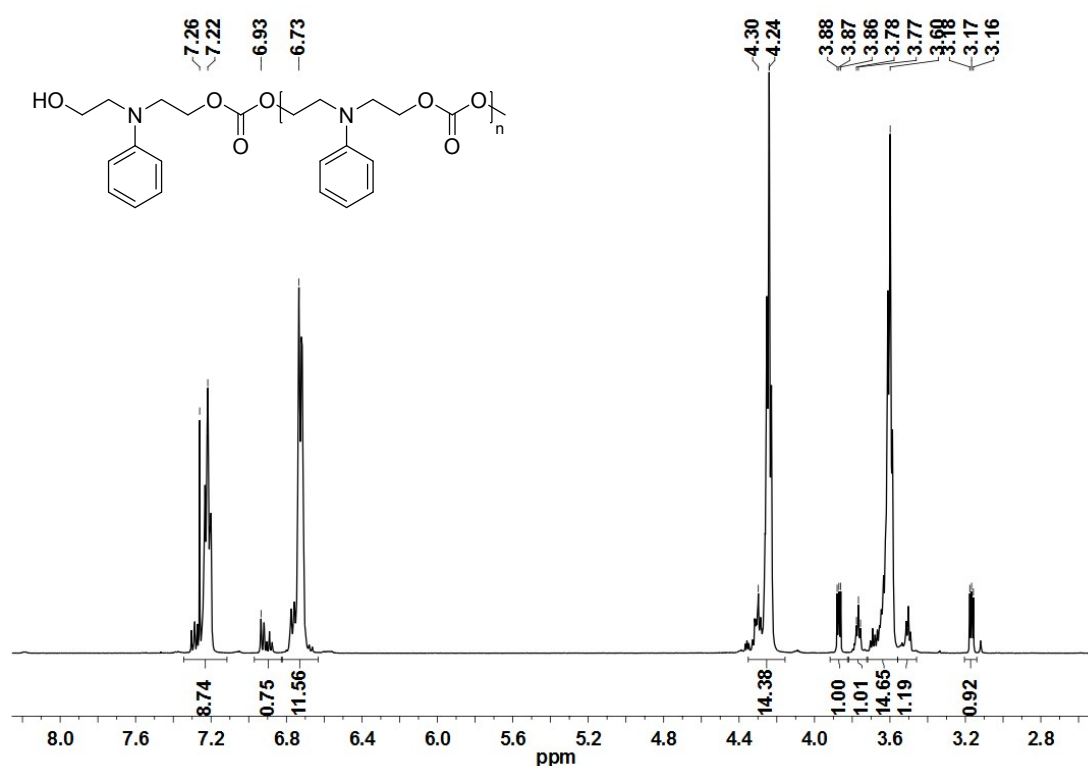



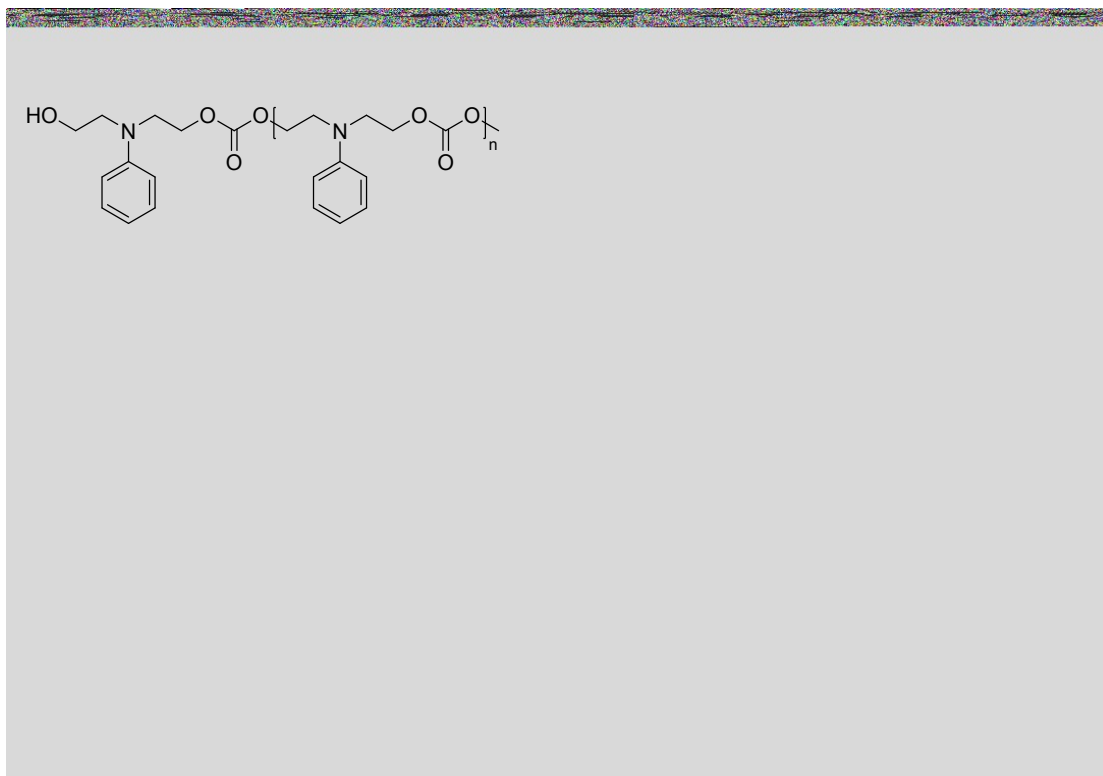

**Figure SI-5.**  $^1\text{H}$  and  $^{13}\text{C}$  NMR spectra of PDEAC

**Poly(cyclohexan-1,4-dimethylene carbonate), (PCDMC, Figure SI-6)**

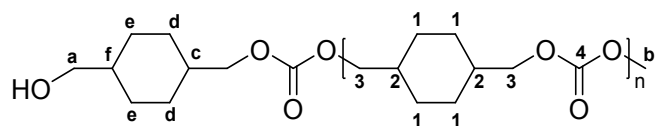

$^1\text{H}$ -NMR (500 MHz,  $\text{CDCl}_3$ )

$\delta$  (ppm) = 0.97-1.90 (m, 10 H,  $^1\text{CH}_2$ ,  $^2\text{CH}$ ), 3.44-3.54 (m, 2 H,  $^a\text{CH}_2$ ), 3.77 (s, 3 H,  $\text{O}^b\text{CH}_3$ ), 3.93-4.04 (m, 4 H,  $^3\text{CH}_2$ )

$^{13}\text{C}$ -NMR (125 MHz,  $\text{CDCl}_3$ )

$\delta$  (ppm) = 25.18, 28.64 (4 C,  $^1\text{CH}_2$ ), 25.41 (2 C,  $^d\text{CH}_2$ ), 28.90 (2 C,  $^e\text{CH}_2$ ), 34.56, 37.12 (2 C,  $^2\text{CH}$ ), 37.39 (1 C,  $^c\text{CH}$ ), 40.42 (1 C,  $^f\text{CH}$ ), 54.72 (1 C,  $^b\text{CH}_3$ ), 68.74, (1 C,  $^a\text{CH}_2$ ), 70.66, 72.80 (2 C,  $^3\text{CH}_2$ ), 155.55 (1 C,  $^4\text{C}_q$ )

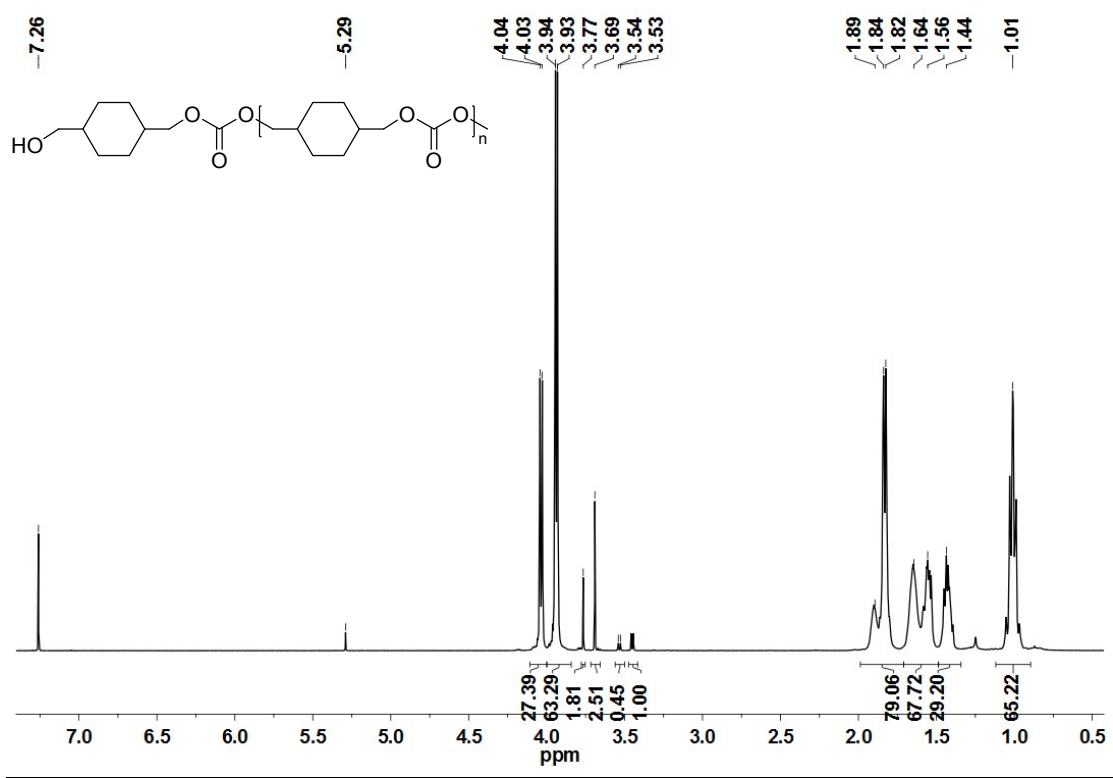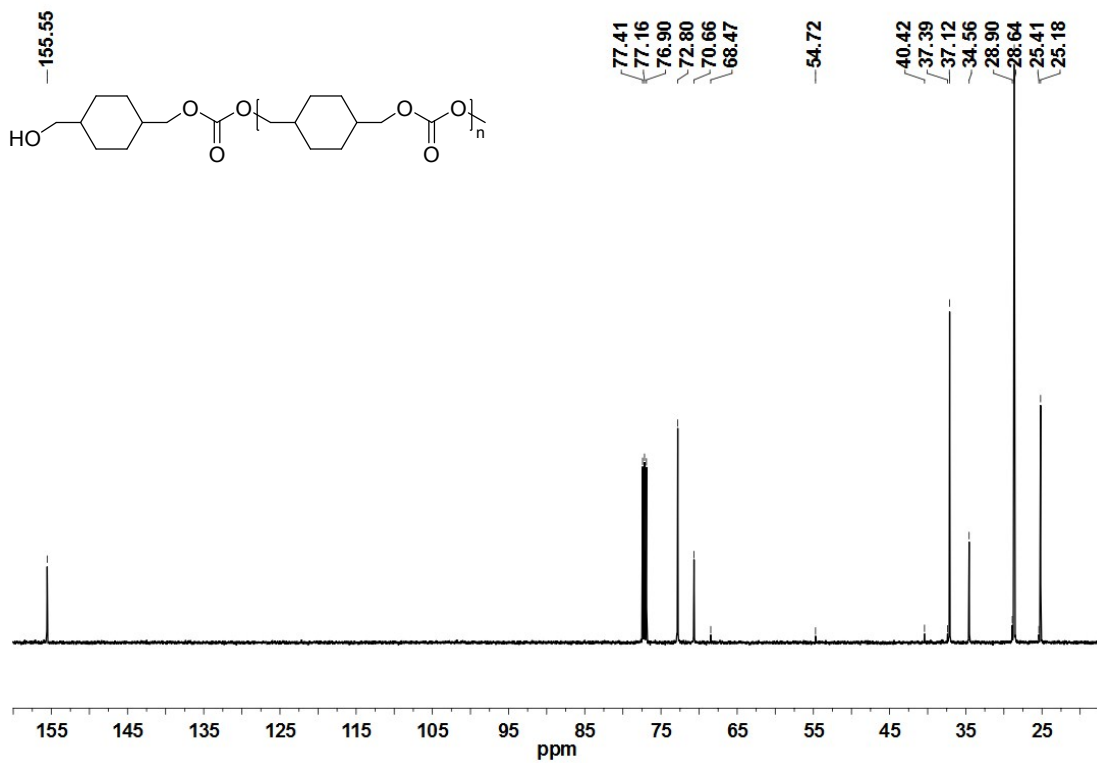

Figure SI-6.  $^1\text{H}$  and  $^{13}\text{C}$  NMR spectra of PCDMC

**Poly(butylene carbonate)-co-poly(pentamethylene carbonate), (PBC-co-PPC, Figure SI-7)**

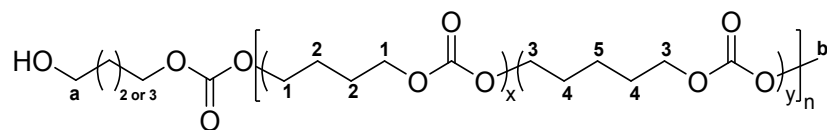

$^1\text{H-NMR}$  (500 MHz,  $\text{CDCl}_3$ )

$\delta$  (ppm) = 1.46 (m, 2 H,  $^5\text{CH}_2$ ), 1.63-1.73 (m, 4 H,  $^4\text{CH}_2$ ), 1.76 (m, 4 H,  $^2\text{CH}_2$ ), 3.67 (m, 2 H,  $^a\text{CH}_2$ ), 3.77 (s, 3 H,  $\text{O}^b\text{CH}_3$ ), 4.10-4.20 (m, 4 H,  $^1\text{CH}_2$ ; 4 H,  $^3\text{CH}_2$ )

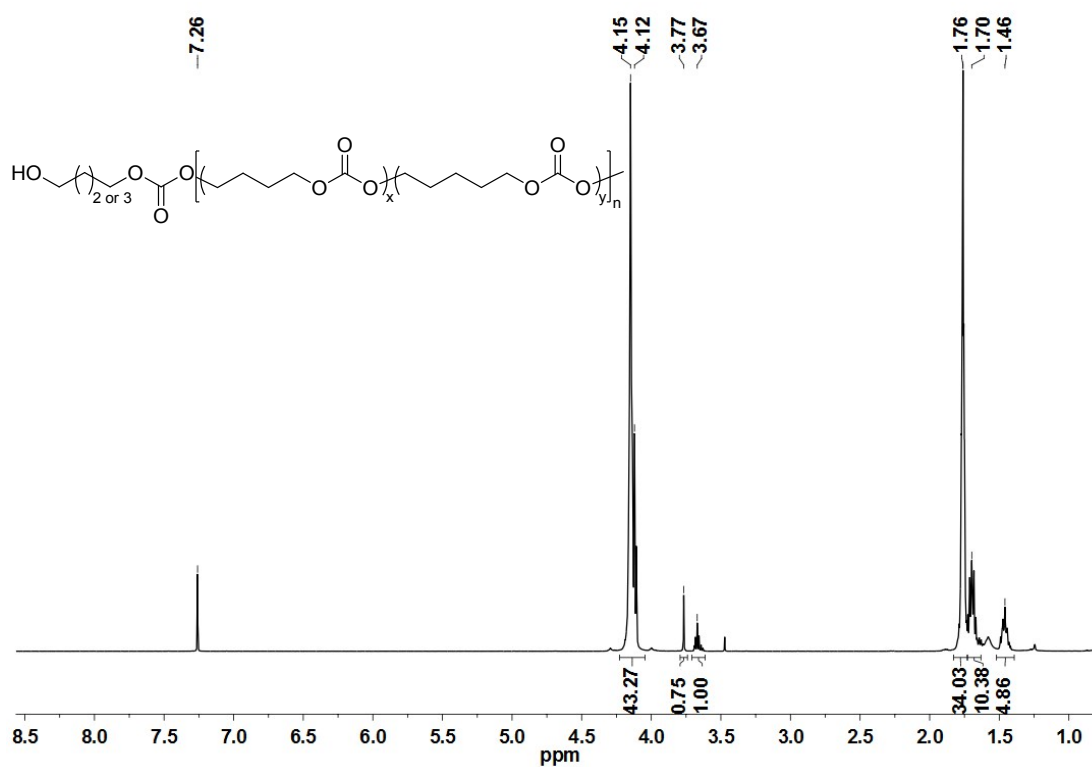

**Figure SI-7.**  $^1\text{H}$  NMR spectrum of PBC-co-PPC

**Poly(butylene carbonate)-co-poly(hexamethylene carbonate), (PBC-co-PHC, Figure SI-8)**

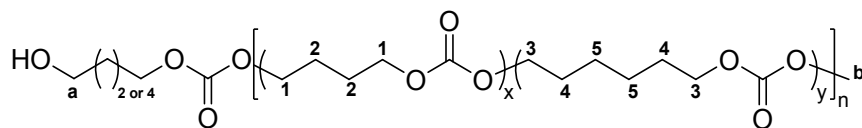

$^1\text{H-NMR}$  (500 MHz,  $\text{CDCl}_3$ )

$\delta$  (ppm) = 1.40 (m, 4 H,  $^5\text{CH}_2$ ), 1.67 (m, 4 H,  $^4\text{CH}_2$ ), 1.77 (m, 4 H,  $^2\text{CH}_2$ ), 3.62-3.69 (m, 2 H,  $^a\text{CH}_2$ ), 3.77-3.78 (m, 3 H,  $\text{O}^b\text{CH}_3$ ), 4.00-4.27 (m, 4 H,  $^1\text{CH}_2$ ; 4 H,  $^3\text{CH}_2$ )

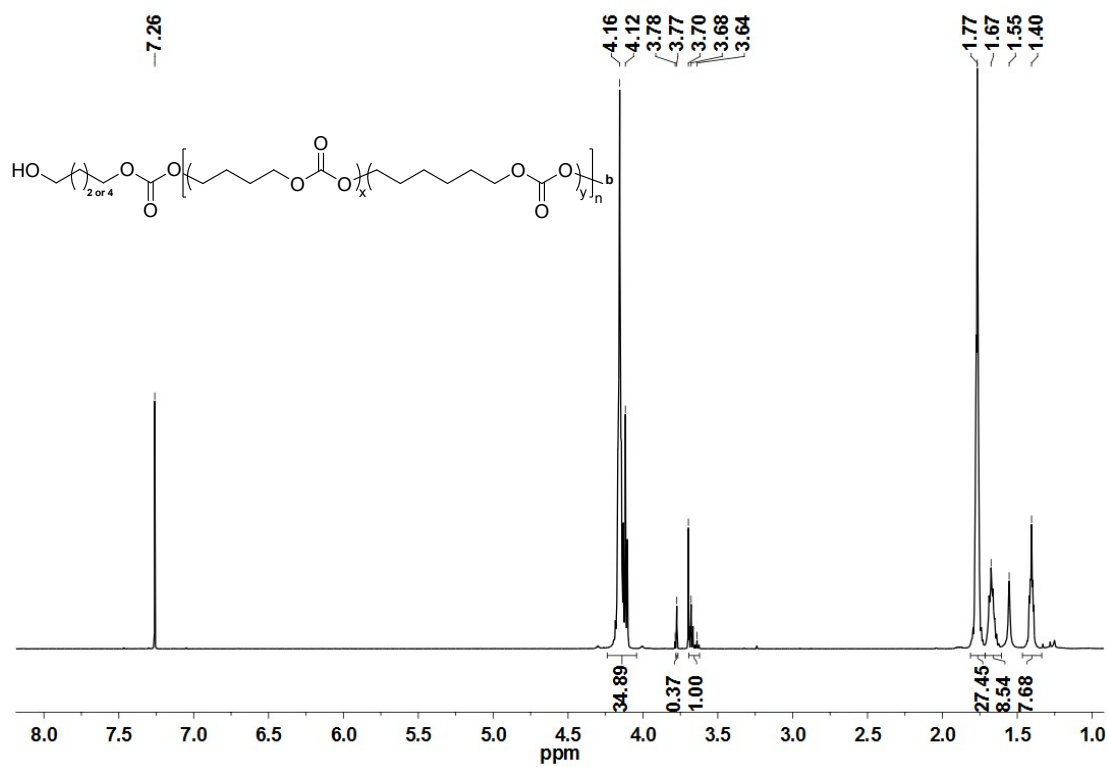

**Figure SI-8.**  $^1\text{H}$  NMR spectrum of PBC-co-PHC

**Poly(butylene carbonate)-co-poly(diethylphenylamine carbonate), (PBC-co-PDEAC, Figure SI-9)**

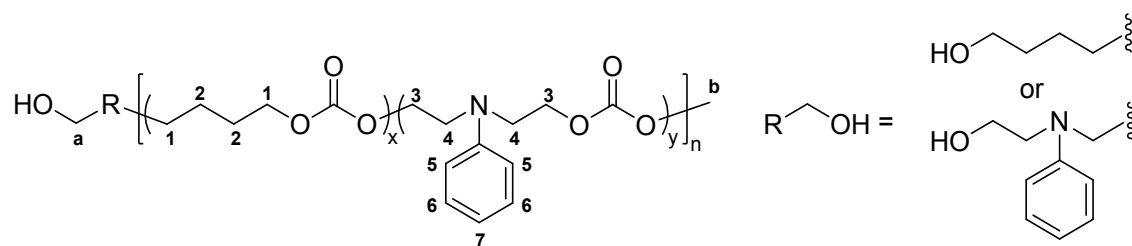

$^1\text{H-NMR}$  (500 MHz,  $\text{CDCl}_3$ )

$\delta$  (ppm) = 1.75 (m, 4 H,  $^2\text{CH}_2$ ), 3.65 (m, 2 H,  $^a\text{CH}_2$ ), 3.76 (b, 3 H,  $\text{O}^b\text{CH}_3$ ), 4.14 (m, 4 H,  $^1\text{CH}_2$ ), 4.26 (m, 4 H,  $^3\text{CH}_2$ ), 6.73 (m, 3 H,  $^{5,7}\text{CH}$ ), 7.21(m, 2 H,  $^6\text{CH}$ )

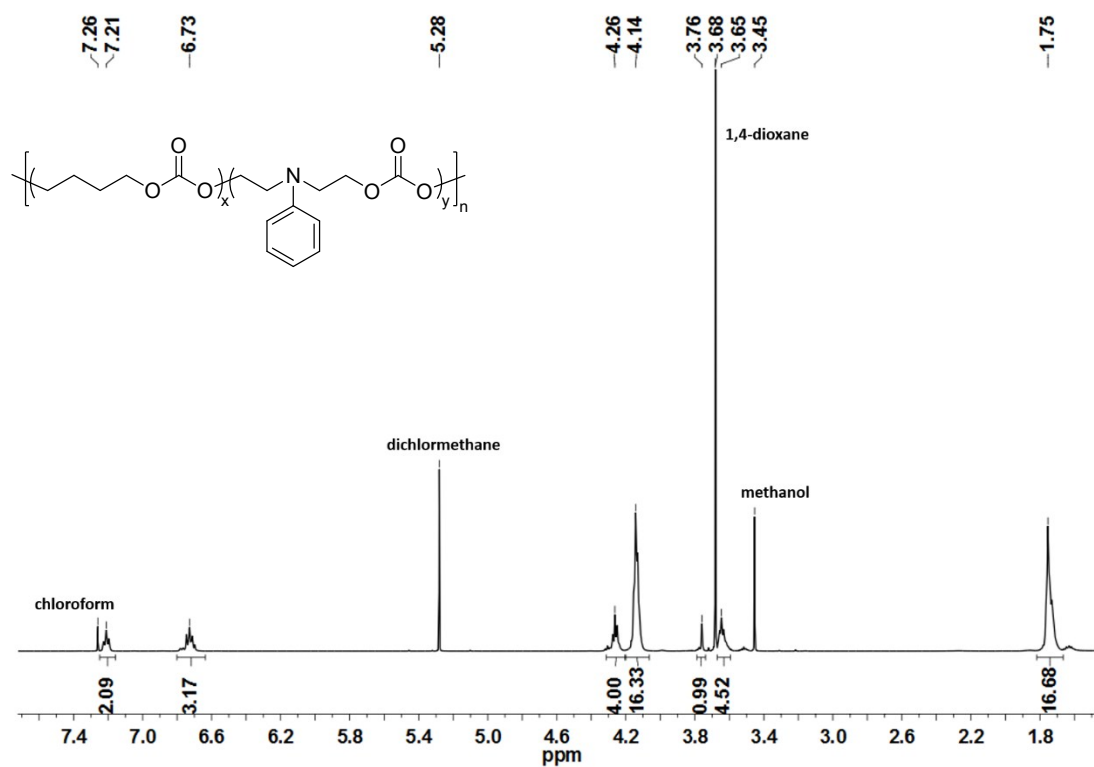

**Figure SI-9.**  $^1\text{H-NMR}$  spectrum of PBC-co-PDEAC

**Poly(butylene carbonate)-co-poly(cyclohexan-1,4-dimethylene carbonate), (PBC-co-PCDMC, Figure SI-10)**

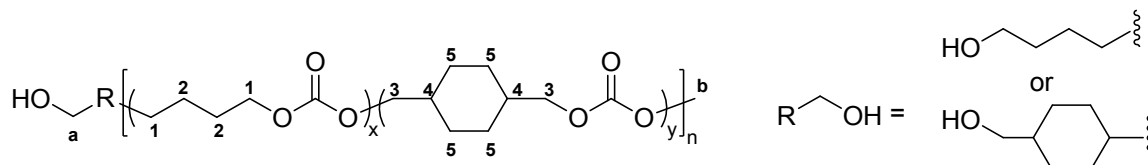

<sup>1</sup>H-NMR (500 MHz, CDCl<sub>3</sub>)

δ (ppm) = 0.90-1.90 (m, 4 H, <sup>2</sup>CH<sub>2</sub>; 10 H, <sup>4</sup>CH, <sup>5</sup>CH<sub>2</sub>), 3.66 (t, <sup>3</sup>J<sub>HH</sub> = 7.3 Hz, 2 H, <sup>a</sup>CH<sub>2</sub>), 3.75 (b, 3 H, O<sup>b</sup>CH<sub>3</sub>), 3.90-4.05 (m, 4 H, <sup>3</sup>CH<sub>2</sub>), 4.14 (m, 4 H, <sup>1</sup>CH<sub>2</sub>)

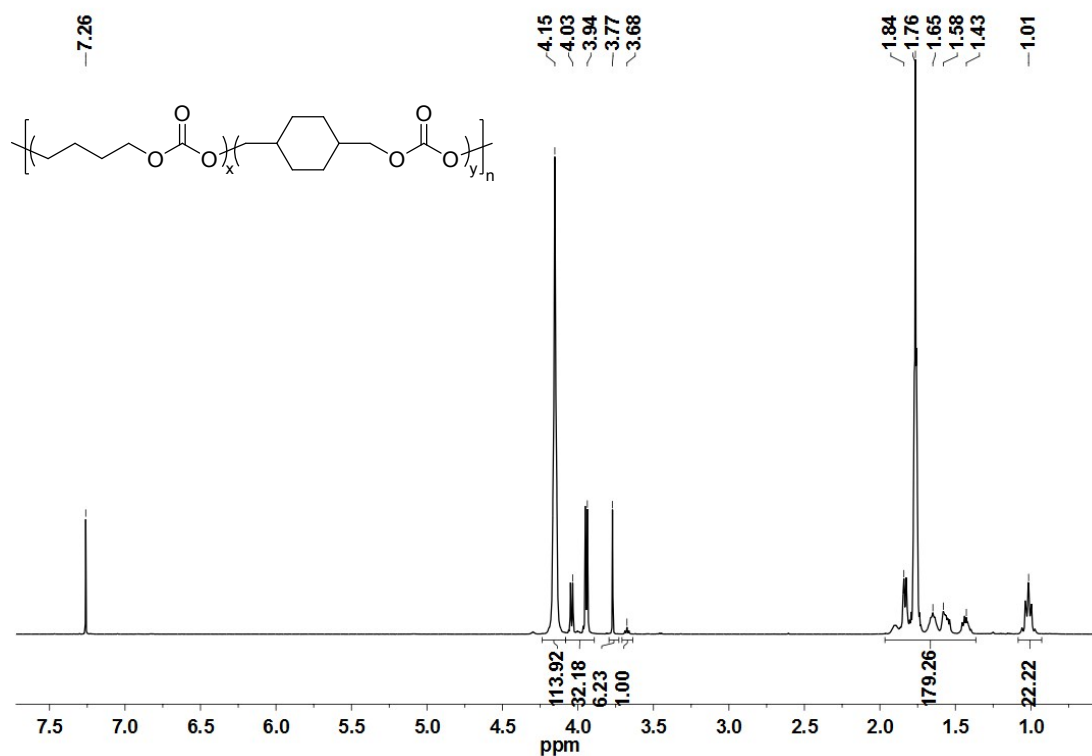

**Figure SI-10.** <sup>1</sup>H NMR spectrum of PBC-co-PCDMC

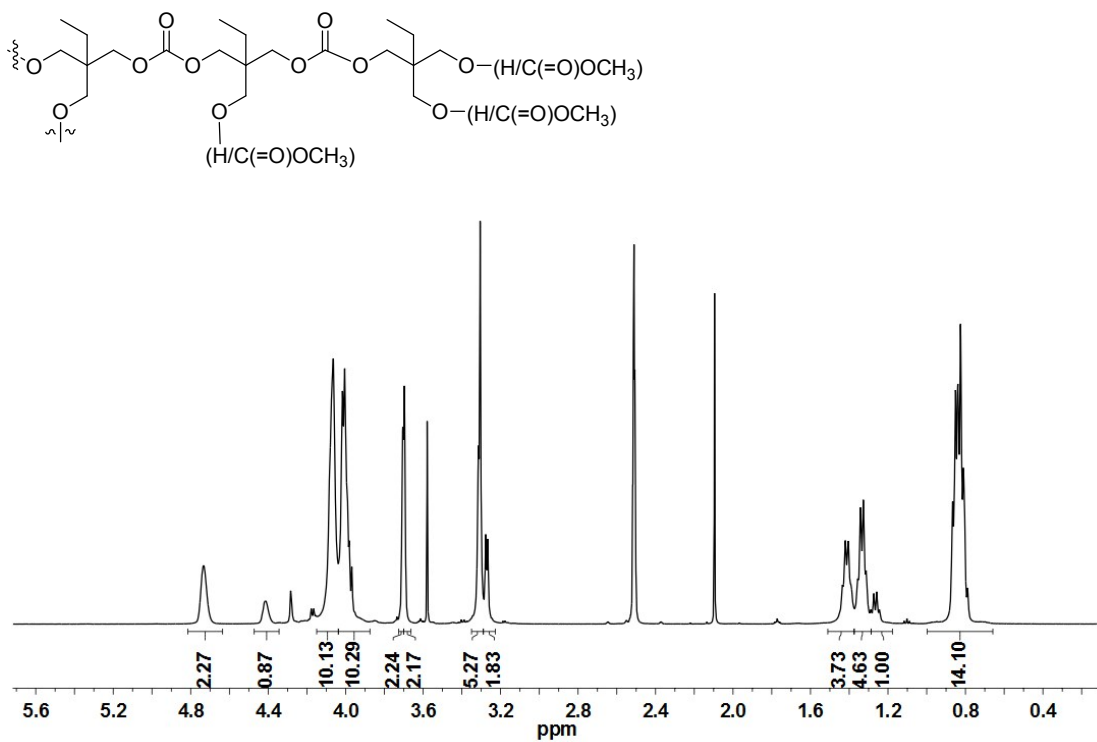

Figure SI-11.  $^1\text{H NMR}$  spectrum of PTHPC

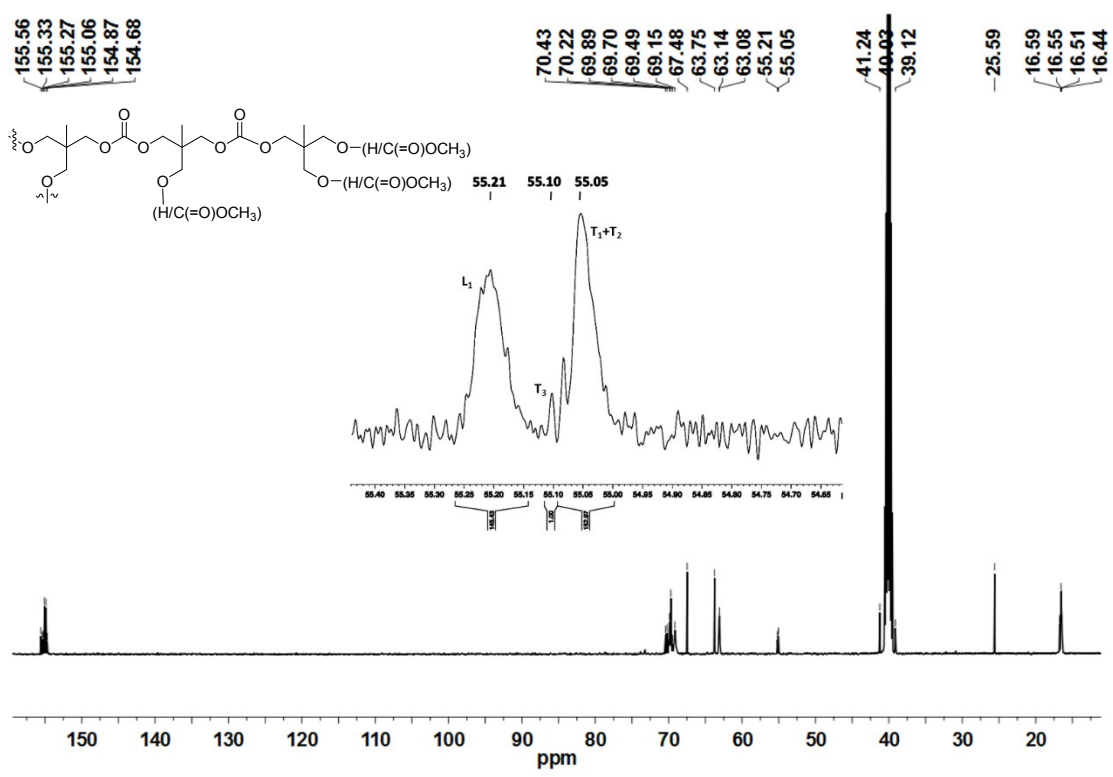

Figure SI-12.  $^{13}\text{C NMR}$  spectrum of PTHPC 1

● Detailed ESI-MS spectrum and analysis of PBC 9

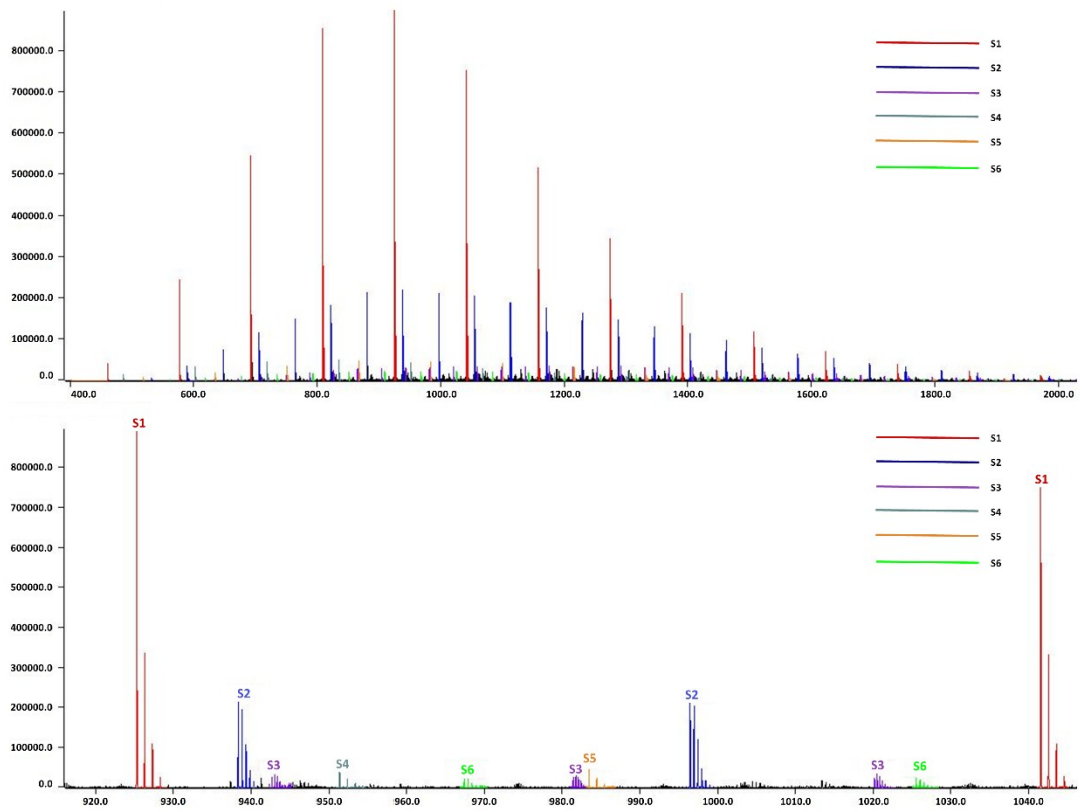

Figure SI-13. Whole spectrum of PBC 9 in the m/z region of 400 to 2000.



Homopolymer Assignments

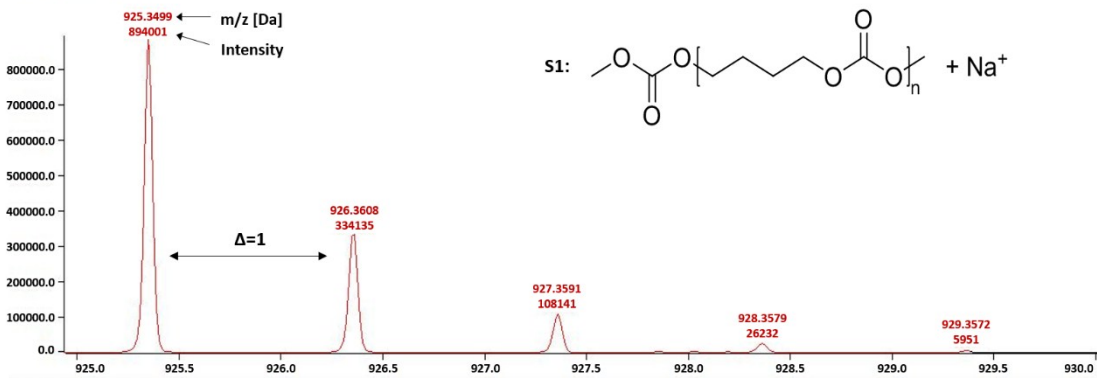

Homopolymer Assignments

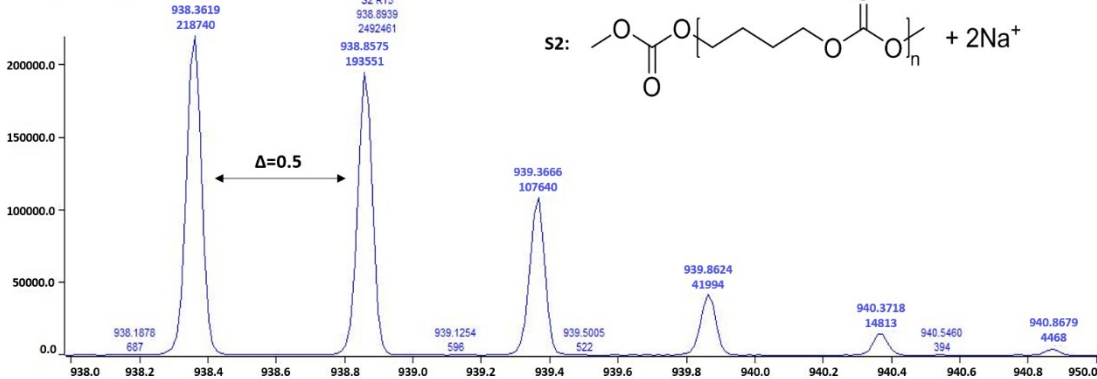

Homopolymer Assignments

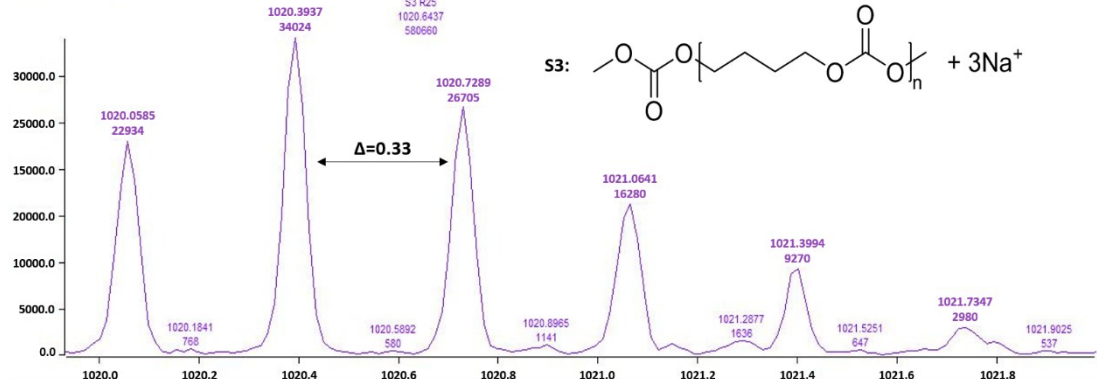

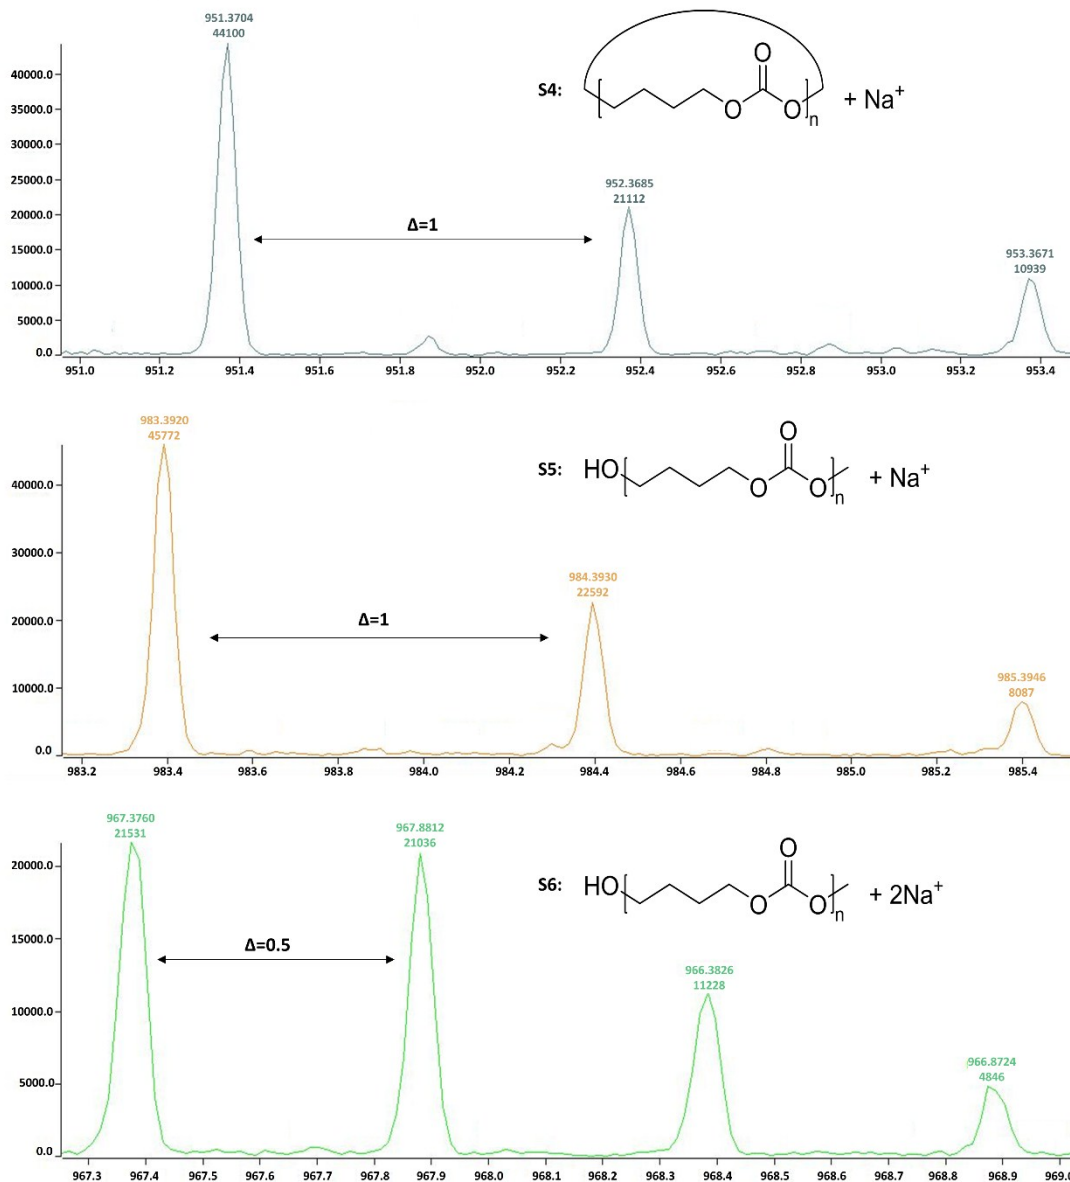

**Figure SI-14.** Detailed analysis of ESI-MS spectrum of PBC 9 (S1-S6)

- Hydrolytic degradation investigation of PBC specimen at 37 °C pH = 7.4 and 55 °C pH = 13.0

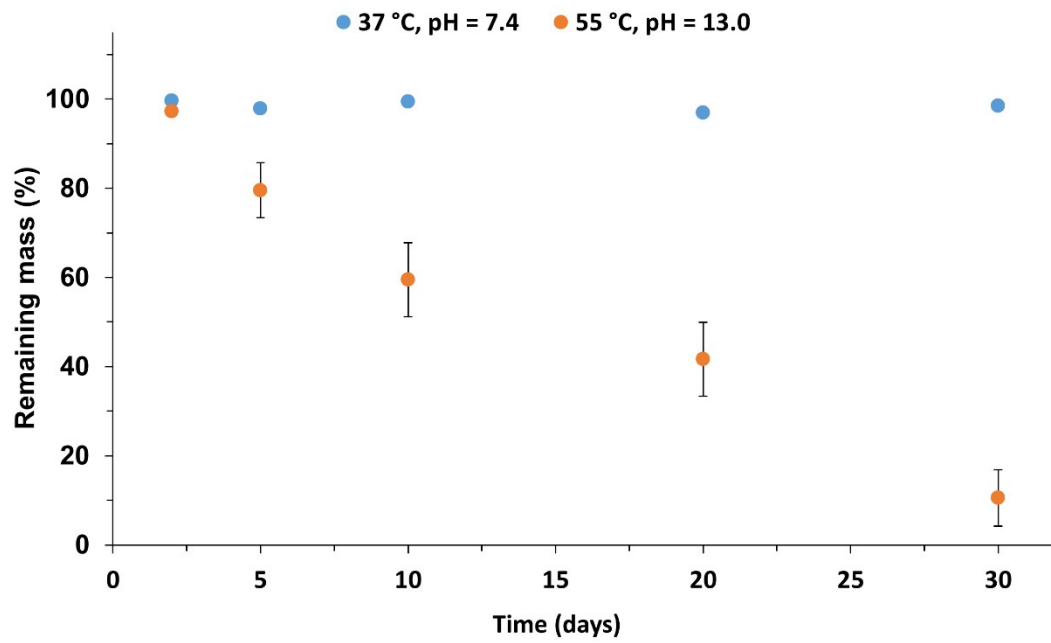

**Figure SI-15.** Mass loss of PBC specimen during 30 days under biological and accelerated conditions, i.e., 37 °C pH = 7.4 and 55 °C pH = 13.0.
